# Supplementary material for: A Network-Based Approach to Prioritize Results from Genome-Wide Association Studies
Source: PLOS journal article supplement (doi:10.1371/journal.pone.0024220), 2011-09-06

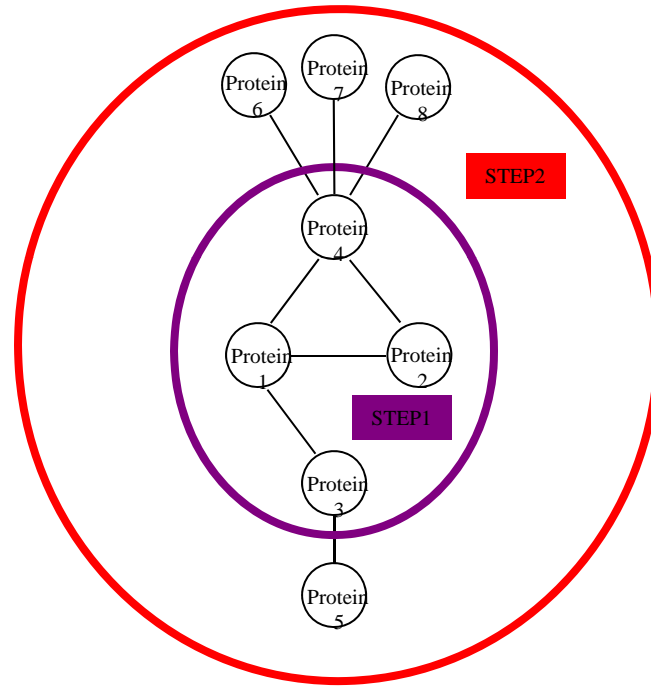

Supplement: S3 (10.1371/journal.pone.0024220.s003) [file journal.pone.0024220.s003]
